# Supplementary material
Source: MDPI journal article supplement (https://www.mdpi.com/2076-3263/11/3/139)
Supplement: s1 [file s1]

| N° | A.D. | Locality             | MCS      | Mw  | TS | SD  |
|----|------|----------------------|----------|-----|----|-----|
| 1  | 1117 | Versilia             | nc       | nc  |    | 5   |
| 2  | 1168 | Pisa                 | V-VI     | 4,5 |    | 5   |
| 3  | 1306 | Lucca                | VI       | 4,7 |    | 4   |
| 4  | 1322 | Pisa                 | V-VI     | 4,5 |    | 5   |
| 5  | 1414 | Villa Basilica       | VII      | 5,2 |    | 4   |
| 6  | 1464 | Fabbriche di Vallico | V        | 4,5 |    | 3   |
| 7  | 1481 | Fivizzano            | VIII     | 5,5 |    | 2_3 |
| 8  | 1481 | Lucca                | V-VI     | 4,5 |    | 4   |
| 9  | 1481 | S.Giuliano           | V-VI     | 4,5 |    | 5   |
| 10 | 1497 | Lunigiana            | VIII-IX  | 5,9 |    | 2   |
| 11 | 1545 | Borgo V.Taro         | VII-VIII | 5,3 |    | 2   |
| 12 | 1630 | Pescia               | V-VI     | 4,5 |    | 4   |
| 13 | 1641 | Pontremoli           | VI       | 4,7 |    | 2   |
| 14 | 1646 | Livorno              | VII      | 4,7 | IV | 5   |
| 15 | 1740 | Piastroso            | VII-VIII | 5,2 |    | 3   |
| 16 | 1742 | Livorno              | VII      | 4,9 | VI | 5   |
| 17 | 1746 | Barga                | VII-VIII | 5   |    | 3   |
| 18 | 1767 | Monzone              | VII      | 5   |    | 2_3 |
| 19 | 1771 | Livorno              | V-VI     | 4,5 | VI | 5   |
| 20 | 1778 | Alpi Apuane          | VI       | 4,7 |    | 2_3 |
| 21 | 1790 | Tendola              | V-VI     | 4,9 |    | 2_3 |
| 22 | 1808 | Melorie              | VI       | 4,8 |    | 5   |
| 23 | 1809 | La Spezia            | nc       | nc  | V  | 6   |
| 24 | 1814 | Livorno              | VI-VII   | 5,1 |    | 5   |
| 25 | 1822 | La Spezia            | nc       | nc  |    | 6   |
| 26 | 1834 | Lunigiana            | IX       | 5,8 |    | 2   |
| 27 | 1837 | Alpi Apuane          | IX-X     | 5,9 |    | 2   |
| 28 | 1846 | Orciano Pisano       | X        | 5,9 | IV | 5   |
| 29 | 1861 | Varese Ligure        | VI       | 4,6 |    | 6   |
| 30 | 1878 | Olivola              | VI-VII   | 5   |    | 2_3 |
| 31 | 1891 | Villa Basilica       | V-VI     | 4,5 |    | 4   |
| 32 | 1894 | Melorie              | V-VI     | 4,5 |    | 5   |
| 33 | 1897 | Val D'Arno inf       | V-VI     | 4,6 |    | 4   |
| 34 | 1902 | Barga                | VII      | 4,9 |    | 3   |
| 35 | 1902 | Fivizzano            | VII      | 5,1 |    | 2_3 |
| 36 | 1903 | Bagnone              | VII-VIII | 5,3 |    | 2   |
| 37 | 1906 | Alta Val Taro        | V        | 4,2 |    | 2   |
| 38 | 1914 | Melorie              | VI       | 4,7 |    | 5   |
| 39 | 1921 | Bagnone              | V        | 4,2 |    | 2   |
| 40 | 1914 | Ponte a Moriano      | VII      | 5,8 |    | 4   |
| 41 | 1916 | Fosciandora          | VI       | 4,7 |    | 3   |
| 42 | 1919 | Piastroso            | V-VI     | 4,5 |    | 3   |
| 43 | 1920 | Fivizzano            | X        | 6,5 |    | 2_3 |
| 44 | 1921 | Pontremoli           | VII      | 4,7 |    | 2   |
| 45 | 1926 | Lunigiana            | V-VI     | 4,5 |    | 2   |
| 46 | 1926 | Alta Val di Vara     | V        | 4,2 |    | 6   |
| 47 | 1931 | Fivizzano            | VI       | 4,7 |    | 2_3 |
| 48 | 1939 | Vagli                | V-VI     | 4,5 |    | 3   |
| 49 | 1950 | Rosignano            | VI-VII   | 4,8 |    | 5   |
| 50 | 1951 | Gallatoio            | V-VI     | 4,5 |    | 3   |
| 51 | 1955 | Sarzana              | V-VI     | 4,5 |    | 6   |
| 52 | 1955 | Soliera              | V        | 4,4 |    | 2_3 |
| 53 | 1973 | Melorie              | VI       | 4,7 |    | 5   |

Supplementary Table S2. Historical seismicity derived from CFTI5Med [37] and CPTI15 [35] databases. N°: EQ numbered in Figure 12 and reported in table S1; A.D. Anno Domini: year of the EQ; locality of maximum damage; MCS: Intensity derived from the reconstructed macroseismic field after [37]; Mw: inferred Magnitude based on the interpretation of I MCS after [35,37]; TS: Tsunami intensity based on [135]. SD: structural domain as referred in the this paper.
