# Supplementary material
Source: MDPI journal article supplement (https://www.mdpi.com/2076-3263/11/3/139)
Supplement: s1 [file s1]

| STRUCTURAL DOMAIN           | Fault number | Faults and systems               | Approximate fault length (km) | slip mode | Age of oldest recorded displacement | Faulted markers (H/F) | Approximate largest cumulative vertical displacement (m) | Approximate long term slip rate derived from total offset (mm/yr) | Age of youngest recorded displacement | Youngest faulted marker (see Figure 2) | Approximate vertical displacement across youngest markers (m) | Approximate short term slip rate derived from youngest offset (mm/yr) | References    | Historical earthquakes and instrumental seismicity on or nearby the fault (numbers as in Table S2) |
|-----------------------------|--------------|----------------------------------|-------------------------------|-----------|-------------------------------------|-----------------------|----------------------------------------------------------|-------------------------------------------------------------------|---------------------------------------|----------------------------------------|---------------------------------------------------------------|-----------------------------------------------------------------------|---------------|----------------------------------------------------------------------------------------------------|
| <b>SD 2</b>                 |              |                                  |                               |           |                                     |                       |                                                          |                                                                   |                                       |                                        |                                                               |                                                                       |               |                                                                                                    |
| West-dipping                | <b>1</b>     | Groppodoliosio-Compione-Comano   | 40                            | N (NS)    | Early Pliocene                      | L-sbL /Mg             | > 2000                                                   | 0,4                                                               | Late Pleistocene                      | Iera Congl./KnpH                       | 20/103                                                        | 0,2/0,8-0,6                                                           | [59,66,73,78] | 11,13, 26                                                                                          |
|                             | <b>2</b>     | Arzengio-Bagnone                 | 25                            | N         | Early Pleistocene                   | L-sbL /Mg             | 600                                                      | 0,2                                                               | Late Pleistocene                      | Iera Congl.                            | 20                                                            | 0,2                                                                   | [59,66]       | 36,39                                                                                              |
|                             | <b>3</b>     | Mocrone-Licciana-(Fivizzano)     | 30                            | N         | mid Early Pleist.                   | L-sbL /Mg             | 400                                                      | 0,2                                                               | Middle Pleistocene                    | MGV Congl.                             | 100                                                           | 0,3                                                                   | [59,66,67]    | 45                                                                                                 |
| East-dipping                | <b>4</b>     | Coloretta-Parana-Podenzana       | 35                            | N         | Early Pleistocene                   | L-sbL /Mg             | 700                                                      | 0,3                                                               | Late Pleistocene-Holocene             | nc                                     | nc                                                            | nc                                                                    | [59]          | 37                                                                                                 |
|                             | <b>5</b>     | Arzelato-Mulazzo-Tresana-Aulla   | 25                            | N         | Early Pleistocene                   | L-sbL /Mg             | 1000                                                     | 0,2                                                               | late Middle Pleist. - Holoc.          | alluvial dep.                          | 9                                                             | 0,4-0,7                                                               | [68,69]       | 13                                                                                                 |
| <b>SD 3</b>                 |              |                                  |                               |           |                                     |                       |                                                          |                                                                   |                                       |                                        |                                                               |                                                                       |               |                                                                                                    |
| <b>Sub-Domain North</b>     |              |                                  |                               |           |                                     |                       |                                                          |                                                                   |                                       |                                        |                                                               |                                                                       |               |                                                                                                    |
| East-dipping                | <b>6</b>     | Gorfigliano-Vagli                | 15                            | N         | Early Pliocene                      | Mg/L Tr-eJ            | 1500                                                     | 0,3                                                               | Middle Pleistocene                    | MAC Congl.                             | 200                                                           | 0,6                                                                   | [77,86]       | 48                                                                                                 |
|                             | <b>7</b>     | Casciana-Sillicano               | 15                            | N         | Late Pliocene                       | L-sbL /Mg             | 400                                                      | 0,1                                                               | Late Pleistocene                      | alluvial dep.                          | 70                                                            | 0,5                                                                   | [56,60,64,66] | 48                                                                                                 |
| West-dipping                | <b>8</b>     | Verrucole-S.Romano               | 17                            | N         | Late Pliocene                       | L-sbL /Mg             | 400                                                      | 0,1                                                               | Late Pleistocene-Holocene             | alluvial dep.                          | 18                                                            | 0,1                                                                   | [56,77,83]    | 34                                                                                                 |
|                             | <b>9</b>     | Sillano-Corfino                  | 17                            | N (ND)    | Early Pleistocene                   | Mg/L Tr-eJ            | 600                                                      | 0,2                                                               | Late Pleistocene-Holocene             | alluvial dep./KnpH                     | 20/64                                                         | 0,2/0,5-0,4                                                           | [56,66,73,77] | 17,34,1985                                                                                         |
|                             | <b>10</b>    | Mt.Prado                         | 12                            | N         | nc                                  | Mg/L J-KT             | 320                                                      | nc                                                                | post-LGM                              | nc                                     | nc                                                            | nc                                                                    | [66,77]       | 15,42                                                                                              |
| <b>"M.Perpoli"</b>          | <b>11</b>    | M.Perpoli bounding Faults        | 10                            | OS (ND)   | nc                                  | L-sbL /Mg             | > 250                                                    | nc                                                                | Middle Pleist.-Holocene               | alluvial dep.                          | 150                                                           | 0,4                                                                   | [66,77,82,83] | 17,34,41,1985,2013                                                                                 |
| <b>Sub-Domain South</b>     |              |                                  |                               |           |                                     |                       |                                                          |                                                                   |                                       |                                        |                                                               |                                                                       |               |                                                                                                    |
| West-dipping                | <b>12</b>    | Foce Fobi-Mt.Uccelliera-Mt.Mosca | 14                            | N         | nc                                  | Mg/L J-KT             | 250                                                      | nc                                                                | nc                                    | nc                                     | nc                                                            | nc                                                                    | [56,66,77]    |                                                                                                    |
|                             | <b>13</b>    | Foggeta-Coronato-Mt.Memoriant    | 17                            | N         | nc                                  | Mg/Mg                 | 300                                                      | nc                                                                | nc                                    | nc                                     | nc                                                            | nc                                                                    | [56,66,77]    |                                                                                                    |
|                             | <b>14</b>    | Barga                            | 12                            | N         | early Pliocene                      | Mg/L J-KT             | 700                                                      | 0,1                                                               | Late Pleistocene-Holocene             | KnpH                                   | 80                                                            | 0,6                                                                   | [56,66,73,77] | 17,34,41                                                                                           |
| East-dipping                | <b>15</b>    | Bolognana-Giovinano              | 12                            | N         | early Pliocene                      | Mg/L J-KT             | 1500                                                     | 0,3                                                               | Late Pleistocene-Holocene             | KnpH                                   | 39                                                            | 0,3                                                                   | [56,66,73,77] | 17,34                                                                                              |
|                             | <b>16</b>    | Borgo a Mozzano                  | 10                            | N         |                                     | Mg/L J-KT             | 150                                                      | nc                                                                | nc                                    | nc                                     | nc                                                            |                                                                       | [56,77]       | 5,31                                                                                               |
|                             | <b>17</b>    | Pescaglia-Valdottavo             | 25                            | N         | early Pliocene ?                    | Mg/L J-KT             | 750                                                      | 0,2                                                               | nc                                    | nc                                     | nc                                                            |                                                                       | [56,77]       |                                                                                                    |
| <b>SD2-SD3 Link. Domain</b> |              |                                  |                               |           |                                     |                       |                                                          |                                                                   |                                       |                                        |                                                               |                                                                       |               |                                                                                                    |
|                             | <b>18_a</b>  | Fosdinovo                        | 5                             | OS (ND)   | early Pliocene                      | L-sbL /Mg             | 700                                                      | 0,1                                                               | nc                                    | nc                                     | nc                                                            | nc                                                                    | [50,58,89]    | 1955                                                                                               |
|                             | <b>18_b</b>  | Tenerano-Marciaso                | 10                            | OS (ND)   | early Pliocene                      | Mg/metTU              | 2000                                                     | 0,4                                                               | nc                                    | nc                                     | nc                                                            | nc                                                                    | [50,57,58,66] |                                                                                                    |
|                             | <b>18_c</b>  | Aiola-Equi Terme                 | 6                             | OS (ND)   | early Pliocene                      | Mg/metTU              | 3000                                                     | 0,6                                                               | Middle Pleistocene                    | Lupacino Congl.                        | 300                                                           | 0,4                                                                   | [50,57,87,89] | 7,20,27,35,43,47,2013                                                                              |
|                             | <b>19</b>    | Ponzanello-Tendola               | 9                             | OS (ND)   | early Pliocene                      | L-sbL /Mg             | 600                                                      | 0,1                                                               | Late Pleistocene                      | MGV Congl.                             | 50                                                            | 0,4                                                                   | [50,59,72]    | 21,1995                                                                                            |
|                             | <b>20</b>    | Gorasco - S.Terenzo M.           | 7                             | OS (ND)   | nc                                  | L-sbL /L-sbL          | nc                                                       | nc                                                                | Late Pleistocene                      | MGV Congl.                             | 20                                                            | 0,2                                                                   | [59,72]       | 21,1995                                                                                            |
|                             | <b>21</b>    | Olivola-Soliera                  | 12                            | N(D)      | Early Pleistocene                   | L-sbL /L-sbL          | 180                                                      | 0,2                                                               | Late Pleistocene                      | alluvial dep.                          | 50                                                            | 0,4                                                                   | [59,66,73]    | 30,1955                                                                                            |
|                             | <b>22</b>    | Gramolazzo                       |                               | OS (ND)   | Early Pliocene                      | L-sbL /Mg             | nc                                                       | nc                                                                | Late Pleistocene                      | alluvial dep.                          | nc                                                            | nc                                                                    | [86]          |                                                                                                    |
| <b>SD4</b>                  |              |                                  |                               |           |                                     |                       |                                                          |                                                                   |                                       |                                        |                                                               |                                                                       |               |                                                                                                    |
|                             | <b>23</b>    | Mt.Albano                        | > 20                          | NS        | Early-Mid.Plioc(Pleist.)            | L-sbL /Mg             | 1000(600)                                                | 0,2(0,2)                                                          | mid Early Pleistocene                 | Marginone fm.                          | 150                                                           | 0,2                                                                   | [92,94]       |                                                                                                    |
|                             | <b>24</b>    | Montecatini-Ponte a Moriano      | 20                            | ND        | Early-Middle Plioc.                 | L-sbL /Mg             | 1000                                                     | 0,2                                                               | Middle-Late Pleistocene               | scree dep.                             | 50                                                            | 0,1                                                                   | [92,94]       | 4,5,12,31                                                                                          |
|                             | <b>24_1</b>  | North Lucca                      | 10                            | ND        | nc                                  | L-sbL /Mg             | 150                                                      | nc                                                                | Late Pleistocene                      | alluvial dep.                          | nc                                                            | nc                                                                    | [91,92,94]    | 3,8                                                                                                |
|                             | <b>25a</b>   | West Cerbaie                     | 10                            |           | Pleistocene                         | Montecarlo Cg.        | 400                                                      | 0,2                                                               | late Middle Pleistocene               | Cerbaie Congl.                         | 110                                                           | 0,3                                                                   | [91,92,93]    | 33                                                                                                 |
|                             | <b>25b</b>   | East Cerbaie                     | 10                            |           | Pleistocene                         | Montecarlo Cg.        | 400                                                      | 0,2                                                               | late Middle Pleistocene               | Cerbaie Congl.                         | 110                                                           | 0,3                                                                   | [91,92,93]    | 33                                                                                                 |
|                             | <b>26</b>    | East Mt.Pisano                   | 12                            |           | Early Plioc. (Pleist.)              | L-sbL/metTU           | 2000(400)                                                | 0,4(0,2)                                                          | late Middle Pleistocene               | Cerbaie Congl.                         | 100                                                           | 0,3                                                                   | [91,92,93]    | 33                                                                                                 |
|                             | <b>27</b>    | Bientina                         | 18                            |           | Early Pliocene                      | L-sbL/metTU           | 2000                                                     | 0,4                                                               | late Middle Pleistocene               | Cerbaie Congl.                         | 100                                                           | 0,3                                                                   | [91,93]       | 33                                                                                                 |
|                             | <b>28</b>    | S.Croce sull'Arno                | 10                            | OS(NS)    | Pleistocene                         | Marginone fm.         | 500                                                      | 0,2                                                               | Late Pleistocene                      | alluvial dep.                          | 10                                                            | 0,3                                                                   | [91,93]       |                                                                                                    |

|                        |             |                                   |    |        |                   |                |       |     |                            |                |      |     |                 |                           |
|------------------------|-------------|-----------------------------------|----|--------|-------------------|----------------|-------|-----|----------------------------|----------------|------|-----|-----------------|---------------------------|
|                        | <b>29</b>   | Tinaia                            | 4  | OS(NS) | Early Pliocene    | nc             | 150   | nc  | nc                         | nc             | nc   | nc  | [91,92]         |                           |
|                        | <b>30</b>   | Livorno-Empoli                    | 70 | OS(NS) | Early Pliocene    | base Miocene   | 2600  | 0,5 | Middle Pleistocene         | alluvial dep.  | 65   | 0,2 | [46,47,97,98]   | 19,22,24,28,32,38,49,1973 |
| <b>SD5</b>             |             |                                   |    |        |                   |                |       |     |                            |                |      |     |                 |                           |
| west-dipping Apuane FS | <b>31_a</b> | West Mt.Pisano                    | 20 | N      | Late Miocene      | L-sbL/metTU    | >3600 | 0,7 | Early Pleistocene          | alluvial dep.  | >500 | 0,2 | [100,102,103]   | 1,2,4,9                   |
|                        | <b>31_b</b> | Vecchiano-Massarosa               | 18 | N      | Early Pleistocene | Mg/L Tr-eJ     | 200   | 0,1 | Late Pleistocene           | alluvial dep.  | 10   | 0,6 | [100,103,105]   | 1,9                       |
|                        | <b>31_c</b> | Pietrasanta-Massa                 | 34 | N      | Late Miocene      | L-sbL/metTU    | >3600 | 0,7 | Early Pleistocene          | alluvial dep.  | >500 | 0,2 | [57,100]        |                           |
| east-dipping           | <b>31_e</b> | Viareggio basin                   | 25 | N      | Late Miocene      | Seq2-6/Substr. | >3600 | 0,7 | Middle Pleistocene         | alluvial dep.  | 200  | 0,3 | [30,46,100,104] |                           |
|                        | <b>32_d</b> | Viareggio basin                   | 20 | N      | Early Pliocene    | Seq4-6/Substr. | 1900  | 0,4 | nc                         | nc             | nc   | nc  | [30,46,100,104] |                           |
|                        | <b>32_c</b> | Viareggio basin                   | 25 | N      | Late Miocene      | Seq2-6         | 2100  | 0,4 | nc                         | nc             | nc   | nc  | [30,46,100,104] |                           |
|                        | <b>32_b</b> | Viareggio basin                   | 30 | N      | Early Pliocene    | Seq2-6         | 1300  | 0,3 | nc                         | nc             | nc   | nc  | [30,46,100,104] |                           |
|                        | <b>32_a</b> | Viareggio basin                   | 34 | N      | Early Pliocene    | Seq5-6/Substr. | 1200  | 0,2 | nc                         | nc             | nc   | nc  | [30,46,100,104] |                           |
| <b>SD6</b>             |             |                                   |    |        |                   |                |       |     |                            |                |      |     |                 |                           |
| west-dipping           | <b>31_d</b> | Sarzana-Carrara                   | 25 | NS     | Early Pliocene    | L-sbL /L-sbL   | 700   | 0,1 | Late Pleistocene           | alluvial dep.  | 75   | 0,6 | [50,58,107,109] | 1955                      |
|                        | <b>33</b>   | Mt.Grosso-Mt.Cornoviglio-Mt.Vruga | 35 | N      | Early Pliocene    |                | 400   | 0,1 | nc                         | nc             | nc   | nc  | [50,58,107,109] |                           |
|                        | <b>33_t</b> | S.Stefano                         | 7  | OS(ND) | nc                | L-sbL /L-sbL   | 200   | nc  | Late Pleistocene           | alluvial dep.  | 20   | 0,2 | [50,58,107,109] | 2009, 2013                |
| east-dipping           | <b>34</b>   | Ameglia-Vezzano-P.Battolla        | 40 | N      | Early Pliocene    | L-sbL/metTU    | 1000  | 0,2 | mid Early Pleistocene-Hol. | alluvial dep.  | 200  | 0,1 | [50,58,107,109] | 2009, 2013                |
|                        | <b>35</b>   | Beverino-Borghetto Vara           | 16 | N      | nc                | L-sbL /L-sbL   | 50    | nc  | Late Pleistocene-Holocene  | alluvial dep.  | nc   | nc  | [50,58,107,109] | 46                        |
|                        | <b>36</b>   | La Spezia                         | 20 | N      | Early Pliocene    | L-sbL/L Tr-eJ  | 2000  | 0,4 | mid Early Pleistocene      | P.Barca Congl. | 100  | 0,1 | [50,58,107,109] | 25                        |
|                        |             |                                   |    |        |                   |                |       |     |                            |                |      |     |                 |                           |

Supplementary Table S1: Columns (A) Structural domain; (C) Main Fault systems/segments, with identification number (B) as reported in Figures 3,5,8,9,10; (D): approximate fault length, in km; (E): Slip mode (N: normal; ND normal and dextral; NS normal and sinistral; OS: oblique slip; (F): timing of first recorded displacement; (G): Displaced marker (H/F hangingwall/footwall); (H): Approximate largest cumulative vertical displacement (m); (I): Approximate long term slip rate derived from total displacement and oldest age data; (J): age of younger documented displacement; (K): youngest faulted marker (Ligurian-subLigurian units; Tuscan nappe with Mg; Late J-K/T; Late Trias-eJ; metamorphic Tuscan units) ; KnpH: height of knickpoint in riverbed crossed by the fault [73]; see Figure 2); (L): Approximate vertical displacement recorded in youngest marker (m) ; (M): Approximate short term slip rate from youngest displacement and age data; (N): references where reported data can be found; (O): historical and instrumental seismicity related to the fault systems or structural domains ( Identification numbers as in Table S2; for post-1955 earthquakes, the year is provided. In the whole table, nc for not constrained.
